# Supplementary material for: microRNA-21 promotes breast cancer proliferation and metastasis by targeting LZTFL1
Source: PubMed Central journal article supplement (PMC6661096; doi:10.1186/s12885-019-5951-3), 2019-07-27
Supplement: 12885_2019_5951_MOESM1_ESM.pdf [file 12885_2019_5951_MOESM1_ESM.pdf]

# Supplemental Materials

## 1. Supplementary Figure

A

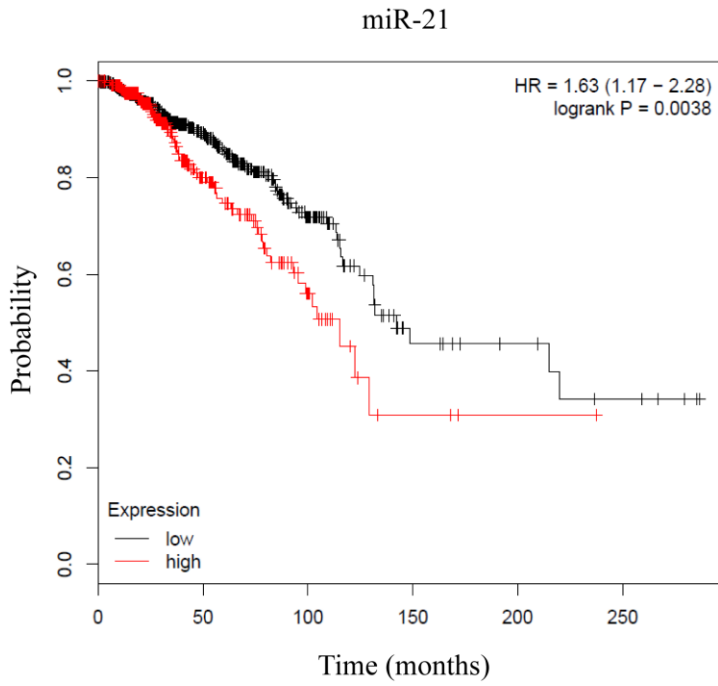

B

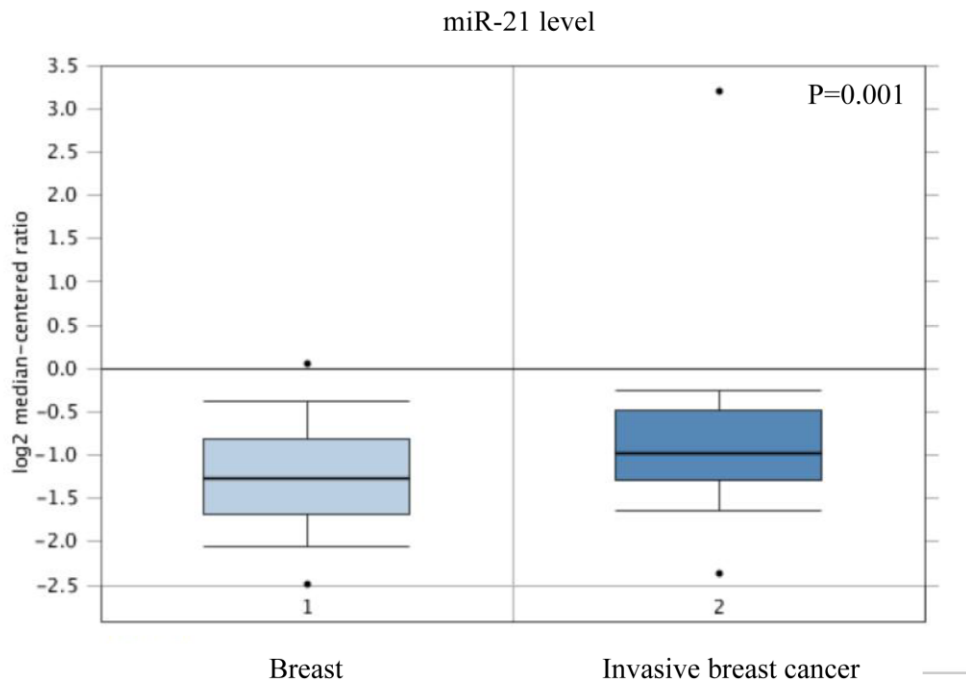

**Figure S1. The expression level and survival analysis of miR-21 in breast cancer patients from TCGA database.** A. The overall survival rates of breast cancer patients (n=1061) with low or high expression levels of miR-21 were estimated with the Kaplan–Meier method by log-rank test according to data from the Cancer Genome Atlas (TCGA) on Kaplan–Meier Plotter platform (<http://kmplot.com/analysis/>). B. The relative miR-21 expression levels in normal breast tissue (n=61) and invasive breast cancer tissue (n=76) were analyzed according to data from TCGA provided by Oncomine (<https://www.oncomine.org>).
